# Supplementary material for: Genotypes and phenotypes in a Wolbachia-ant symbiosis
Source: PeerJ. 2024 Jul 26;12:e17781. doi: 10.7717/peerj.17781 (PMC11285360; doi:10.7717/peerj.17781)
Supplement: Data S1 [file peerj-12-17781-s001.xlsx]

## Sheet: Wolbachia densities
Colony	Patriline	Individual	Wolbachia CT	Host CT	CT Referance Wolbachia	CT Referance Host
Ae07P4	1	47	26.4501	18.3431	28.056	19.2896
Ae07P4	1	54	26.0508	20.7692	28.896	23.053
Ae07P4	1	65	27.0262	21.5143	28.896	23.053
Ae07P4	1	53	29.9289	24.3954	28.896	23.053
Ae07P4	1	61	26.7114	21.1498	28.896	23.053
Ae07P4	1	67	28.1005	22.3553	28.896	23.053
Ae07P4	1	79	24.5318	16.6792	26.638	18.876
Ae07P4	1	49	28.0094	19.0549	27.7815	19.0518
Ae07P4	1	95	25.6388	16.769	28.3618	19.8924
Ae07P4	1	72	24.9422	16.7568	26.638	18.876
Ae07P4	1	12	26.6712	16.6565	28.9276	19.7795
Ae07P4	1	8	26.4831	16.7181	28.9012	20.0104
Ae07P4	1	18	25.8919	20.2135	28.3733	23.6968
Ae07P4	1	3	26.7775	18.2377	28.4233	21.1277
Ae07P4	1	23	27.6227	19.5709	29.2543	22.4868
Ae07P4	1	21	28.1809	17.6441	28.6768	19.7003
Ae07P4	2	51	26.8118	21.7775	28.896	23.053
Ae07P4	2	78	27.9713	22.8768	28.896	23.053
Ae07P4	2	76	28.3218	23.2228	28.896	23.053
Ae07P4	2	56	27.2739	22.0728	28.896	23.053
Ae07P4	2	57	27.3564	21.9869	28.896	23.053
Ae07P4	2	73	27.6046	22.1508	28.896	23.053
Ae07P4	2	40	33.7857	25.147	28.056	19.2896
Ae07P4	2	81	28.5704	22.7707	28.896	23.053
Ae07P4	2	91	27.4736	19.145	27.8832	19.5216
Ae07P4	2	84	26.9428	18.0278	27.8832	19.5216
Ae07P4	2	5	26.9525	21.4068	27.9238	23.6979
Ae07P4	2	22	29.1374	20.8289	29.2543	22.4868
Ae07P4	2	15	24.4405	16.09	28.1176	21.8338
Ae07P4	3	69	25.9952	19.0238	27.8832	19.5216
Ae07P4	3	55	24.9065	17.7685	27.8832	19.5216
Ae07P4	3	90	24.1841	16.9728	27.8832	19.5216
Ae07P4	3	60	26.3811	19.1625	27.8832	19.5216
Ae07P4	3	87	26.7061	19.1556	27.8832	19.5216
Ae07P4	3	96	25.0175	22.5182	26.0788	23.1321
Ae07P4	3	85	25.5919	18.0592	26.638	18.876
Ae07P4	3	9	25.1818	18.8188	28.974	22.2808
Ae07P4	3	52	26.6776	18.5026	27.8832	19.5216
Ae07P4	3	59	27.1339	18.7242	27.8832	19.5216
Ae07P4	3	63	25.8139	17.2007	27.8832	19.5216
Ae07P4	3	82	27.6061	18.9229	27.8832	19.5216
Ae07P4	3	66	27.6605	18.7539	27.8832	19.5216
Ae07P4	3	10	24.4401	17.1389	27.696	20.9366
Ae07P4	3	20	26.944	16.119	28.6968	18.8308
Ae07P4	3	6	29.0213	18.6623	31.255	22.0572
Ae07P4	4	71	24.1842	21.9893	26.0788	23.1321
Ae07P4	4	50	26.0134	23.5113	26.0788	23.1321
Ae07P4	4	74	24.7958	22.0508	26.0788	23.1321
Ae07P4	4	75	25.1642	22.0473	26.0788	23.1321
Ae07P4	4	43	25.6163	16.6169	28.056	19.2896
Ae07P4	4	28	26.723	17.6432	28.056	19.2896
Ae07P4	4	64	26.0555	22.739	26.0788	23.1321
Ae07P4	4	86	25.2418	21.9157	26.0788	23.1321
Ae07P4	4	35	25.4804	16.1411	28.056	19.2896
Ae07P4	4	48	25.9543	16.5348	28.056	19.2896
Ae07P4	4	45	27.0651	17.3776	28.056	19.2896
Ae07P4	4	17	26.5691	18.8389	29.0314	22.2334
Ae07P4	4	7	27.6661	17.4359	28.9012	20.0104
Ae07P4	4	4	28.2053	22.6504	27.9238	23.6979
Ae07P4	4	24	31.4225	19.6585	31.7892	22.2551
Ae07P4	6	83	24.6438	23.2319	26.0788	23.1321
Ae07P4	6	94	24.4237	22.4079	26.0788	23.1321
Ae07P4	6	70	25.3565	22.479	26.0788	23.1321
Ae07P4	6	34	26.3594	17.4301	28.056	19.2896
Ae07P4	6	32	26.2707	17.2677	28.056	19.2896
Ae07P4	6	62	26.4639	23.1535	26.0788	23.1321
Ae07P4	6	68	24.6539	16.0073	26.638	18.876
Ae07P4	6	16	27.8744	19.552	29.0314	22.2334
Ae07P4	6	11	24.8707	16.4821	27.696	20.9366
Ae088	1	3	27.3107	18.4022	28.8877	20.1621
Ae088	1	6	27.81	18.7893	28.8877	20.1621
Ae088	1	25	24.5923	19.4846	26.8175	21.3098
Ae088	1	32	30.0582	22.9712	26.8175	21.3098
Ae088	1	50	25.2726	18.0736	27.9391	20.5656
Ae088	1	54	27.564	20.1903	27.9391	20.5656
Ae088	1	58	24.3638	17.331	27.9391	20.5656
Ae088	1	61	27.2425	17.8683	28.1759	18.8412
Ae088	1	72	27.4046	16.059	28.1759	18.8412
Ae088	1	77	25.1889	19.5897	28.4015	21.6449
Ae088	1	82	24.2343	18.436	28.4015	21.6449
Ae088	1	88	24.6878	19.0337	25.7554	19.2139
Ae088	1	90	25.8005	18.8036	25.7554	19.2139
Ae088	2	2	30.1198	17.6627	28.8877	20.1621
Ae088	2	17	25.0962	17.5929	25.9357	19.7378
Ae088	2	22	24.6077	17.92	25.9357	19.7378
Ae088	2	27	23.6138	19.9408	26.8175	21.3098
Ae088	2	28	25.5184	19.9725	26.8175	21.3098
Ae088	2	31	28.1497	21.7847	26.8175	21.3098
Ae088	2	34	27.3994	19.9566	26.8175	21.3098
Ae088	2	35	26.3062	23.7784	26.8175	21.3098
Ae088	2	39	25.9468	17.5362	28.5259	18.832
Ae088	2	43	32.9401	21.8722	28.5259	18.832
Ae088	2	44	28.4608	18.4381	28.5259	18.832
Ae088	2	46	26.9292	18.6238	28.5259	18.832
Ae088	2	47	28.089	20.1014	28.5259	18.832
Ae088	2	51	27.1746	19.0163	27.9391	20.5656
Ae088	2	63	25.6158	18.0134	28.1759	18.8412
Ae088	2	67	28.0843	18.4915	28.1759	18.8412
Ae088	2	74	29.6637	25.0538	28.4015	21.6449
Ae088	2	87	27.5386	22.3069	25.7554	19.2139
Ae088	2	89	28.2477	20.4431	25.7554	19.2139
Ae088	2	91	23.7242	18.9651	25.7554	19.2139
Ae088	2	92	24.0238	18.5235	25.7554	19.2139
Ae088	5	7	28.1139	18.8824	28.8877	20.1621
Ae088	5	15	23.2252	17.8361	25.9357	19.7378
Ae088	5	16	25.1054	19.3288	25.9357	19.7378
Ae088	5	26	23.8649	21.0877	26.8175	21.3098
Ae088	5	36	23.3444	19.157	26.8175	21.3098
Ae088	5	37	27.4159	17.2083	28.5259	18.832
Ae088	5	40	28.3142	17.9382	28.5259	18.832
Ae088	5	42	27.8333	19.6284	28.5259	18.832
Ae088	5	49	27.5676	19.6968	27.9391	20.5656
Ae088	5	56	24.5715	19.337	27.9391	20.5656
Ae088	5	59	30.1589	19.8483	27.9391	20.5656
Ae088	5	60	27.321	19.4633	27.9391	20.5656
Ae088	5	64	28.0299	18.7635	28.1759	18.8412
Ae088	5	71	28.3087	19.0611	28.1759	18.8412
Ae088	5	73	27.0597	21.2101	28.4015	21.6449
Ae088	5	79	27.973	22.7171	28.4015	21.6449
Ae088	5	85	28.5048	25.5867	25.7554	19.2139
Ae088	5	96	28.9016	19.1115	25.7554	19.2139
Ae088	6	1	26.8982	18.4987	28.8877	20.1621
Ae088	6	5	24.8484	16.8932	28.8877	20.1621
Ae088	6	8	27.0153	17.6782	28.8877	20.1621
Ae088	6	10	26.2682	17.0405	28.8877	20.1621
Ae088	6	11	27.9612	19.5914	28.8877	20.1621
Ae088	6	19	23.0117	17.9033	25.9357	19.7378
Ae088	6	20	24.7577	19.6043	25.9357	19.7378
Ae088	6	21	24.7918	19.2809	25.9357	19.7378
Ae088	6	23	24.3707	17.1794	25.9357	19.7378
Ae088	6	24	26.4188	19.0507	25.9357	19.7378
Ae088	6	29	25.4577	18.4864	26.8175	21.3098
Ae088	6	33	23.6555	20.3785	26.8175	21.3098
Ae088	6	41	25.0235	18.619	28.5259	18.832
Ae088	6	48	26.5389	19.0706	28.5259	18.832
Ae088	6	52	25.7479	17.1298	27.9391	20.5656
Ae088	6	53	26.8646	19.3316	27.9391	20.5656
Ae088	6	55	29.1921	20.8529	27.9391	20.5656
Ae088	6	57	24.8317	18.2805	27.9391	20.5656
Ae088	6	62	27.1037	17.0903	28.1759	18.8412
Ae088	6	65	30.0141	19.2647	28.1759	18.8412
Ae088	6	66	26.5054	16.8042	28.1759	18.8412
Ae088	6	70	25.9119	17.2141	28.1759	18.8412
Ae088	6	75	27.8842	21.4828	28.4015	21.6449
Ae088	6	76	32.5109	26.5748	28.4015	21.6449
Ae088	6	78	34.4558	24.7935	28.4015	21.6449
Ae088	6	80	29.023	20.4079	28.4015	21.6449
Ae088	6	81	35.3978	27.8908	28.4015	21.6449
Ae088	6	83	29.0243	25.5915	28.4015	21.6449
Ae088	6	84	28.9198	25.6817	28.4015	21.6449
Ae088	6	94	24.677	16.8169	25.7554	19.2139
AE153	1	30	26.958	20.7161	29.0875	20.6901
AE153	1	83	24.494	19.7781	26.3191	19.6185
AE153	1	68	24.5755	19.4659	26.3191	19.6185
AE153	1	88	31.1169	27.8225	26.3467	21.5509
AE153	1	82	26.9764	21.6492	26.3191	19.6185
AE153	1	4	24.9352	19.4902	26.6297	19.9015
AE153	1	7	24.6107	19.1365	26.6297	19.9015
AE153	1	44	26.5036	22.1722	26.4819	20.952
AE153	1	12	27.003	21.4596	26.6297	19.9015
AE153	1	85	24.4314	20.7715	26.3467	21.5509
AE153	1	55	24.4382	18.7741	26.3191	19.6185
AE153	1	45	28.3563	23.7896	26.4819	20.952
AE153	1	34	23.8583	19.1563	26.4819	20.952
AE153	1	32	24.5014	19.7479	26.4819	20.952
AE153	1	9	27.8081	21.2043	26.6297	19.9015
AE153	1	86	24.4081	19.4053	26.3467	21.5509
AE153	1	8	29.8977	22.8659	26.6297	19.9015
AE153	1	67	27.5806	19.4864	26.3191	19.6185
AE153	2	13	29.6546	27.2404	26.6297	19.9015
AE153	2	81	28.0168	26.4601	26.3467	21.5509
AE153	2	77	29.9983	27.5909	27.6407	22.1611
AE153	2	43	23.7902	21.1529	26.4819	20.952
AE153	2	61	24.5704	20.2752	26.3191	19.6185
AE153	2	28	27.6489	21.268	29.0875	20.6901
AE153	2	56	26.1465	21.2844	26.3191	19.6185
AE153	2	47	34.8616	29.927	26.3191	19.6185
AE153	2	21	26.6034	19.8289	29.0875	20.6901
AE153	2	63	31.3757	25.9805	26.3191	19.6185
AE153	2	17	31.0773	23.7385	29.0875	20.6901
AE153	2	76	28.4603	23.4377	27.6407	22.1611
AE153	2	94	25.0711	20.6233	26.3467	21.5509
AE153	2	19	28.6671	20.2723	29.0875	20.6901
AE153	2	96	28.282	19.4914	28.3618	19.8924
AE153	2	95	27.9433	19.0511	28.3618	19.8924
AE153	2	23	28.5692	19.713	29.0875	20.6901
AE153	2	58	30.7907	23.5737	26.3191	19.6185
AE153	2	71	27.6247	21.5068	27.6407	22.1611
AE153	2	16	32.0496	22.8583	29.0875	20.6901
AE153	2	54	31.0624	24.5652	27.6407	22.1611
AE153	2	91	30.6531	24.5452	26.3467	21.5509
AE153	2	57	28.093	18.8093	26.3191	19.6185
AE153	3	31	31.9813	27.714	29.0875	20.6901
AE153	3	89	30.9992	30.0623	26.3467	21.5509
AE153	3	18	25.8032	21.0541	29.0875	20.6901
AE153	3	1	23.2672	19.0038	26.6297	19.9015
AE153	3	10	24.1704	19.5551	26.6297	19.9015
AE153	3	39	26.9636	23.4223	26.4819	20.952
AE153	3	22	25.9376	19.5142	29.0875	20.6901
AE153	3	46	25.1554	18.472	28.3618	19.8924
AE153	3	48	25.741	18.9508	28.3618	19.8924
AE153	3	35	26.4269	22.5507	26.4819	20.952
AE153	3	51	25.852	19.0226	28.3618	19.8924
AE153	3	73	31.1155	27.2447	27.6407	22.1611
AE153	3	33	24.558	20.6057	26.4819	20.952
AE153	3	5	24.6826	19.5245	26.6297	19.9015
AE153	3	64	25.3899	21.4602	27.6407	22.1611
AE153	3	60	26.1497	21.8432	27.6407	22.1611
AE153	3	62	26.9125	22.5586	27.6407	22.1611
AE153	3	20	29.0752	21.718	29.0875	20.6901
AE153	3	78	27.1133	22.6732	27.6407	22.1611
AE153	3	3	26.7181	20.861	26.6297	19.9015
AE153	3	38	23.9528	19.2821	26.4819	20.952
AE153	3	79	23.7682	19.74	26.3467	21.5509
AE153	3	41	29.9544	22.0869	28.3618	19.8924
AE153	3	74	29.9471	24.9093	27.6407	22.1611
AE153	3	84	24.0766	19.4546	26.3467	21.5509
AE153	3	29	30.1046	21.7141	29.0875	20.6901
AE153	3	87	29.9555	25.1493	26.3467	21.5509
AE153	3	92	27.4875	22.0065	26.3467	21.5509
AE153	3	49	29.0356	19.8452	28.3618	19.8924
AE153	3	40	26.5021	20.1396	26.4819	20.952
AE153	3	70	26.4575	20.0804	27.6407	22.1611
AE153	3	59	31.6592	25.2402	27.6407	22.1611
AE153	3	50	31.953	21.8086	28.3618	19.8924
AE357	1	74	23.1601	18.3142	26.6043	19.4475
AE357	1	31	24.4768	19.2248	26.6043	19.4475
AE357	1	22	28.4065	20.4108	28.9096	20.0667
AE357	1	3	27.037	17.5249	29.7464	19.935
AE357	1	87	23.6037	16.5006	26.6043	19.4475
AE357	1	5	28.0099	17.1507	30.0423	19.5324
AE357	1	9	29.4012	18.606	29.4179	19.4269
AE357	1	1	26.7703	18.4007	27.7282	20.5099
AE357	1	2	26.9473	17.7608	27.7282	20.5099
AE357	1	24	25.8051	20.8671	26.4731	23.5279
AE357	1	77	29.9252	19.1671	26.6043	19.4475
AE357	2	29	25.3452	19.5369	26.6043	19.4475
AE357	2	42	25.4272	20.0124	26.3474	19.7831
AE357	2	81	28.0916	19.8711	27.8353	19.0662
AE357	2	32	25.3978	18.7084	26.6043	19.4475
AE357	2	67	26.597	18.104	27.8353	19.0662
AE357	2	69	27.4847	18.9723	27.8353	19.0662
AE357	2	25	23.649	16.457	26.6043	19.4475
AE357	2	41	26.7678	20.1547	26.3474	19.7831
AE357	2	63	23.3477	16.679	26.3474	19.7831
AE357	2	34	24.0628	16.8015	26.6043	19.4475
AE357	2	61	24.898	18.2193	26.3474	19.7831
AE357	2	71	25.7982	16.8402	27.8353	19.0662
AE357	2	84	26.781	17.774	27.8353	19.0662
AE357	2	79	25.6776	16.6385	27.8353	19.0662
AE357	2	66	24.908	18.0401	26.3474	19.7831
AE357	2	45	25.1377	18.204	26.3474	19.7831
AE357	2	73	27.2289	18.0842	27.8353	19.0662
AE357	2	44	26.3785	19.2749	26.3474	19.7831
AE357	2	27	24.1354	16.437	26.6043	19.4475
AE357	2	86	25.8792	17.5245	26.638	18.876
AE357	2	64	25.7578	18.5337	26.3474	19.7831
AE357	2	75	26.2893	16.8516	27.8353	19.0662
AE357	2	78	26.9546	17.4713	27.8353	19.0662
AE357	2	52	25.9038	18.5862	26.3474	19.7831
AE357	2	59	25.4361	18.1124	26.3474	19.7831
AE357	2	82	26.2462	16.7059	27.8353	19.0662
AE357	2	88	24.6959	16.0105	26.638	18.876
AE357	2	53	25.9429	18.3719	26.3474	19.7831
AE357	2	36	27.7028	18.5177	27.5068	19.4108
AE357	2	11	29.4229	21.2856	28.9136	21.75
AE357	2	49	25.4637	17.7412	26.3474	19.7831
AE357	2	68	26.6451	16.5767	27.8353	19.0662
AE357	2	38	28.539	19.1075	27.5068	19.4108
AE357	2	85	26.5928	17.3293	26.638	18.876
AE357	2	17	27.0584	17.8611	29.0458	21.3128
AE357	2	20	30.8954	19.0078	31.393	21.012
AE357	2	8	28.639	17.2035	29.464	19.593
AE357	2	19	30.888	18.9468	31.393	21.012
AE357	2	10	31.6873	22.6685	28.9136	21.75
AE357	2	6	26.6264	17.7429	28.0298	21.3117
AE357	3	62	27.2153	19.6418	27.5068	19.4108
AE357	3	94	27.0164	19.2699	27.5068	19.4108
AE357	3	51	26.9376	18.7018	27.5068	19.4108
AE357	3	43	25.8769	17.6236	27.5068	19.4108
AE357	3	37	28.0656	19.7247	27.5068	19.4108
AE357	3	18	25.8619	17.3048	28.0759	20.0291
AE357	3	21	27.3439	16.5798	28.9855	19.0216
AE357	3	56	27.7115	18.5901	27.5068	19.4108
AE357	3	13	28.6205	18.4096	28.6336	19.4828
AE357	3	23	26.2717	16.2024	28.9096	20.0667
AE357	3	14	27.9578	17.4087	28.6336	19.4828
AE357	3	4	30.723	18.7408	30.0423	19.5324
AE357	5	90	27.6054	19.3232	27.7815	19.0518
AE357	5	92	24.7056	17.212	26.638	18.876
AE357	5	55	27.1412	18.6423	27.7815	19.0518
AE357	5	40	27.6436	19.0515	27.7815	19.0518
AE357	5	91	27.6019	18.9608	27.7815	19.0518
AE357	5	39	28.3549	19.634	27.7815	19.0518
AE357	5	47	26.7699	18.0413	27.7815	19.0518
AE357	5	65	27.9289	19.1376	27.7815	19.0518
AE357	5	7	27.299	17.2867	29.464	19.593
AE357	5	80	27.3188	18.3165	27.7815	19.0518
AE357	5	12	27.0089	19.4351	28.1658	20.7664
AE357	5	58	27.7179	18.6313	27.7815	19.0518
AE357	5	35	26.082	16.4984	27.7815	19.0518
AE357	5	15	24.8067	19.264	27.5514	22.8499
AE357	5	16	29.9078	21.01	29.0458	21.3128
AE48	1	10	23.158	19.8965	26.0781	19.6357
AE48	1	87	23.8854	20.2315	26.6133	20.0406
AE48	1	67	27.1936	24.8992	27.9492	23.3411
AE48	1	53	23.1174	17.7837	26.7	19.0533
AE48	1	75	24.9975	22.8387	27.6012	23.1435
AE48	1	58	26.5031	20.7461	26.7	19.0533
AE48	1	73	26.0804	22.8703	27.6012	23.1435
AE48	1	76	28.3176	24.9041	27.6012	23.1435
AE48	1	39	23.9396	21.413	25.5474	22.201
AE48	1	56	25.8782	18.6492	26.7	19.0533
AE48	1	38	25.0333	21.7773	25.5474	22.201
AE48	1	86	26.3682	19.5034	26.6133	20.0406
AE48	2	13	26.6016	25.4273	26.4495	23.2822
AE48	2	8	23.4971	18.7894	26.0781	19.6357
AE48	2	32	25.6908	21.2981	27.5758	21.6792
AE48	2	49	23.9545	17.804	26.7	19.0533
AE48	2	9	26.5744	19.4174	26.0781	19.6357
AE48	2	48	25.1246	20.7676	25.5474	22.201
AE48	4	27	27.5807	24.4414	27.5758	21.6792
AE48	4	37	23.714	22.2377	25.5474	22.201
AE48	4	7	23.7943	18.9352	26.0781	19.6357
AE48	4	31	24.2001	19.4464	27.5758	21.6792
AE48	4	84	25.9464	22.2141	27.6012	23.1435
AE48	4	65	28.2339	23.6496	27.9492	23.3411
AE48	4	79	28.8582	23.1051	27.6012	23.1435
AE48	5	15	25.5763	24.8228	26.4495	23.2822
AE48	5	20	23.3349	22.5711	26.4495	23.2822
AE48	5	72	24.1143	21.8623	27.9492	23.3411
AE48	5	51	23.1151	17.682	26.7	19.0533
AE48	5	82	24.6268	22.3238	27.6012	23.1435
AE48	5	23	23.1371	21.9992	26.4495	23.2822
AE48	5	17	23.0008	21.7965	26.4495	23.2822
AE48	5	19	23.0337	21.7431	26.4495	23.2822
AE48	5	24	24.3087	22.9906	26.4495	23.2822
AE48	5	74	24.8018	22.1927	27.6012	23.1435
AE48	5	66	23.956	21.1872	27.9492	23.3411
AE48	5	63	24.785	21.9628	27.9492	23.3411
AE48	5	55	23.9128	17.8206	26.7	19.0533
AE48	5	28	26.8361	22.4843	27.5758	21.6792
AE48	5	33	25.209	20.7548	27.5758	21.6792
AE48	5	52	24.3801	18.1635	26.7	19.0533
AE48	5	25	26.7496	22.1597	27.5758	21.6792
AE48	5	16	25.2023	23.2746	26.4495	23.2822
AE48	5	77	25.9134	22.5829	27.6012	23.1435
AE48	5	78	24.1777	20.7197	27.6012	23.1435
AE48	5	22	23.6716	21.2559	26.4495	23.2822
AE48	5	18	24.7484	22.1741	26.4495	23.2822
AE48	5	26	28.0047	22.6589	27.5758	21.6792
AE48	5	34	27.7604	21.6232	27.5758	21.6792
AE48	5	95	24.6026	17.5433	26.6133	20.0406
AE48	5	80	27.3693	22.2808	27.6012	23.1435
AE48	5	6	26.7782	19.4373	26.0781	19.6357
AE48	5	96	28.3924	19.9532	26.6133	20.0406
AE48	8	62	24.1805	22.4157	27.9492	23.3411
AE48	8	50	23.4691	18.4652	26.7	19.0533
AE48	8	41	23.248	22.4703	25.5474	22.201
AE48	8	36	25.8288	22.4305	27.5758	21.6792
AE48	8	91	24.1641	18.8893	26.6133	20.0406
AE48	8	70	26.1293	22.1988	27.9492	23.3411
AE48	8	40	23.8448	21.0936	25.5474	22.201
AE48	8	88	27.0558	20.6552	26.6133	20.0406
AE48	8	29	28.7325	21.6376	27.5758	21.6792

## Sheet: Morphometrics
Colony	Patriline	Individual	HeadWidth	ThoraxLength	ThoraxWidth	WingLength	WingWidth	Weight
Ae07P4	1	3	2.609	3.936	2.357	8.8735	3.488	0.0396
Ae07P4	4	4	2.599	3.967	2.35	8.8505	3.3625	0.04
Ae07P4	2	5	2.556	3.744	2.372	8.861	3.2765	0.0366
Ae07P4	3	6	2.634	3.863	2.348	8.523	3.31	0.041
Ae07P4	4	7	2.567	3.841	2.29	8.8345	3.3465	0.0385
Ae07P4	1	8	2.562	3.722	2.299	8.699	3.4205	0.0342
Ae07P4	3	9	2.577	3.912	2.389	8.443	3.383	0.0394
Ae07P4	3	10	2.608	3.93	2.526	8.6105	3.3725	0.0401
Ae07P4	6	11	2.662	3.966	2.64	8.934	3.4455	0.0428
Ae07P4	1	12	2.634	3.904	2.414	8.915	3.443	0.0408
Ae07P4	6	16	2.726	4.206	2.557	9.285	3.559	0.0459
Ae07P4	4	17	2.573	3.801	2.468	8.7455	3.278	0.0374
Ae07P4	1	18	2.646	3.836	2.4	8.8915	3.3945	0.0375
Ae07P4	3	20	2.586	3.785	2.351	8.634	3.2795	0.0391
Ae07P4	2	22	2.535	3.935	2.481	8.6535	3.345	0.0416
Ae07P4	1	23	2.558	3.714	2.236	8.576	3.41	0.037
Ae07P4	4	24	2.627	4.029	2.363	8.713	3.4515	0.0402
Ae07P4	4	28	2.641	4.007	2.413	8.854	3.3695	0.0403
Ae07P4	6	32	2.634	4.1	2.412	9.0985	3.416	0.0419
Ae07P4	6	34	2.581	4.1	2.64	8.757	3.34	0.04
Ae07P4	4	35	2.602	4.008	2.484	8.615	3.4055	0.0402
Ae07P4	2	40	2.612	3.926	2.451	8.7195	3.39	0.0391
Ae07P4	4	43	2.592	3.824	2.397	8.4275	3.29	0.0385
Ae07P4	4	45	2.583	4.046	2.36	8.756	3.33	0.0397
Ae07P4	1	47	2.598	4.051	2.376	8.7715	3.427	0.0389
Ae07P4	4	48	2.546	3.941	2.325	8.4075	3.2885	0.036
Ae07P4	1	49	2.596	3.967	2.388	8.9045	3.499	0.0365
Ae07P4	4	50	2.609	3.847	2.36	8.7895	3.373	0.0388
Ae07P4	2	51	2.588	4.017	2.429	8.9645	3.342	0.0402
Ae07P4	3	52	2.61	3.995	2.361	8.818	3.3745	0.0405
Ae07P4	1	53	2.635	4.05	2.373	9.128	3.453	0.0432
Ae07P4	1	54	2.6	3.957	2.463	8.6315	3.3485	0.0387
Ae07P4	3	55	2.61	3.962	2.684	8.8975	3.343	0.0413
Ae07P4	2	56	2.582	4.021	2.435	8.911	3.4375	0.0408
Ae07P4	2	57	2.601	4.03	2.473	8.915	3.3485	0.0406
Ae07P4	3	59	2.55	3.798	2.262	8.4905	3.3445	0.0377
Ae07P4	1	61	2.526	3.823	2.371	8.792	3.339	0.0364
Ae07P4	6	62	2.664	4.144	2.408	9.0665	3.4575	0.0425
Ae07P4	3	63	2.647	3.836	2.474	8.7685	3.432	0.0428
Ae07P4	4	64	2.602	3.898	2.455	8.6975	3.3095	0.0397
Ae07P4	1	65	2.538	3.994	2.187	8.8465	3.3355	0.0365
Ae07P4	3	66	2.581	3.9	2.383	8.4555	3.2615	0.0373
Ae07P4	1	67	2.58	3.916	2.469	8.7905	3.433	0.0387
Ae07P4	5	68	2.631	4.039	2.407	8.8315	3.4345	0.0411
Ae07P4	3	69	2.582	3.949	2.342	8.569	3.2625	0.0383
Ae07P4	6	70	2.681	4.012	2.424	8.4425	3.3775	0.0435
Ae07P4	4	71	2.609	3.906	2.407	8.73	3.408	0.0392
Ae07P4	1	72	2.58	3.907	2.341	8.8585	3.458	0.0371
Ae07P4	2	73	2.612	4.08	2.447	8.4915	3.364	0.0407
Ae07P4	4	74	2.612	4.145	2.366	8.7235	3.386	0.0422
Ae07P4	4	75	2.609	4.008	2.422	8.7785	3.282	0.0493
Ae07P4	2	76	2.577	3.948	2.409	8.806	3.438	0.0423
Ae07P4	1	79	2.626	4.01	2.434	8.862	3.4795	0.0386
Ae07P4	2	81	2.575	3.917	2.437	8.783	3.3625	0.0429
Ae07P4	3	82	2.642	4.079	2.422	8.6775	3.446	0.0408
Ae07P4	2	84	2.594	3.801	2.301	8.587	3.2175	0.0414
Ae07P4	3	85	2.609	3.873	2.239	8.774	3.3555	0.0416
Ae07P4	4	86	2.567	4.006	2.459	9.0305	3.37	0.0384
Ae07P4	3	87	2.661	3.869	2.558	8.5325	3.3675	0.0404
Ae07P4	3	90	2.662	3.781	2.484	8.6355	3.3245	0.0385
Ae07P4	2	91	2.64	3.99	2.398	8.8545	3.3585	0.0412
Ae07P4	6	94	2.641	3.981	2.373	9.038	3.3675	0.0432
Ae07P4	1	95	2.567	3.89	2.357	8.5865	3.33	0.0377
Ae07P4	3	96	2.589	3.921	2.385	8.566	3.3985	0.0398
Ae088	6	1	2.628	4.028	2.41	8.937	3.355	0.0396
Ae088	2	2	2.563	3.826	2.257	8.4865	3.3045	0.0347
Ae088	1	3	2.564	3.902	2.337	8.6425	3.3235	0.0366
Ae088	6	5	2.599	3.985	2.367	8.8075	3.454	0.0402
Ae088	1	6	2.599	3.722	2.319	8.733	3.3885	0.0381
Ae088	5	7	2.592	3.795	2.37	8.935	3.4425	0.0353
Ae088	6	8	2.521	3.806	2.253	8.673	3.32	0.0365
Ae088	6	10	2.561	3.817	2.29	8.698	3.419	0.037
Ae088	6	11	2.545	3.858	2.293	8.505	3.2875	0.0381
Ae088	5	15	2.618	3.89	2.28	8.7065	3.354	0.039
Ae088	5	16	2.568	3.92	2.305	8.699	3.34	0.0385
Ae088	2	17	2.594	3.832	2.335	8.5585	3.3725	0.0375
Ae088	6	19	2.591	3.866	2.234	8.675	3.3475	0.0388
Ae088	6	20	2.619	3.982	2.38	8.8835	3.38	0.0398
Ae088	6	21	2.575	3.853	2.371	8.635	3.377	0.0385
Ae088	2	22	2.589	3.948	2.369	9.002	3.302	0.0366
Ae088	6	23	2.571	3.897	2.27	8.515	3.173	0.0378
Ae088	6	24	2.634	3.917	2.258	8.8755	3.321	0.0388
Ae088	1	25	2.561	3.791	2.336	8.6085	3.3915	0.0367
Ae088	5	26	2.661	3.879	2.272	8.884	3.403	0.0353
Ae088	2	27	2.507	3.843	2.286	8.3755	3.233	0.0354
Ae088	6	29	2.588	3.878	2.304	8.7225	3.4415	0.0388
Ae088	5	30	2.549	3.873	2.241	8.7135	3.356	0.0367
Ae088	2	31	2.467	3.631	2.246	8.491	3.218	0.0348
Ae088	1	32	2.569	3.848	2.274	8.447	3.3815	0.0347
Ae088	6	33	2.578	3.714	2.301	8.581	3.3055	0.039
Ae088	2	34	2.546	3.931	2.338	8.574	3.29	0.0357
Ae088	2	35	2.483	3.846	2.272	8.533	3.263	0.0347
Ae088	5	36	2.623	3.885	2.32	8.6635	3.3395	0.0401
Ae088	5	37	2.557	3.871	2.305	8.624	3.326	0.036
Ae088	2	39	2.546	3.935	2.311	9.045	3.2915	0.0377
Ae088	5	40	2.593	3.893	2.294	8.696	3.315	0.0372
Ae088	6	41	2.555	3.896	2.225	8.818	3.335	0.0366
Ae088	5	42	2.617	3.963	2.227	8.91	3.452	0.0373
Ae088	2	43	2.529	3.85	2.291	8.6565	3.322	0.0356
Ae088	2	44	2.532	3.797	2.176	8.7185	3.337	0.0358
Ae088	2	46	2.549	3.95	2.331	8.7135	3.3875	0.0373
Ae088	2	47	2.562	3.915	2.353	8.741	3.4445	0.0352
Ae088	6	48	2.577	3.953	2.309	8.6665	3.405	0.0385
Ae088	5	49	2.647	3.979	2.383	8.711	3.384	0.0407
Ae088	1	50	2.59	3.818	2.331	8.8375	3.4025	0.0393
Ae088	2	51	2.561	3.973	2.269	8.73	3.309	0.0379
Ae088	6	52	2.591	3.755	2.303	8.7835	3.37	0.0364
Ae088	6	53	2.593	3.84	2.257	8.8445	3.36	0.0376
Ae088	1	54	2.53	3.867	2.325	8.6545	3.375	0.0375
Ae088	6	55	2.507	3.774	2.379	8.373	3.278	0.0356
Ae088	5	56	2.573	3.793	2.186	8.6135	3.3815	0.035
Ae088	6	57	2.559	3.903	2.186	8.541	3.396	0.0362
Ae088	1	58	2.624	3.841	2.279	8.594	3.472	0.0375
Ae088	5	59	2.641	3.838	2.254	8.6725	3.3505	0.0386
Ae088	5	60	2.666	4.027	2.239	8.712	3.351	0.04
Ae088	1	61	2.569	3.927	2.295	8.7865	3.388	0.0395
Ae088	6	62	2.504	3.857	2.349	8.6255	3.268	0.0359
Ae088	2	63	2.506	3.819	2.383	8.5115	3.246	0.0341
Ae088	5	64	2.572	3.942	2.24	8.6465	3.354	0.0388
Ae088	6	65	2.603	3.878	2.223	8.5665	3.375	0.0357
Ae088	6	66	2.563	3.912	2.284	8.7635	3.465	0.0373
Ae088	2	67	2.403	3.846	2.167	8.6165	3.302	0.0336
Ae088	6	70	2.6	3.804	2.388	8.682	3.6665	0.0412
Ae088	5	71	2.606	3.962	2.314	8.8095	3.4765	0.0401
Ae088	1	72	2.522	3.951	2.309	8.4575	3.351	0.0378
Ae088	5	73	2.598	3.938	2.298	8.7495	3.422	0.0376
Ae088	2	74	2.536	3.89	2.333	8.5175	3.284	0.0352
Ae088	6	75	2.526	3.868	2.315	8.7215	3.35	0.0352
Ae088	6	76	2.567	3.984	2.357	8.708	3.3745	0.0377
Ae088	1	77	2.579	3.83	2.364	8.518	3.4225	0.0365
Ae088	6	78	2.516	3.689	2.273	8.655	3.348	0.0343
Ae088	5	79	2.626	3.974	2.328	8.672	3.3995	0.0367
Ae088	6	80	2.548	3.818	2.28	8.597	3.35	0.0359
Ae088	6	81	2.536	3.888	2.29	8.6245	3.393	0.0354
Ae088	1	82	2.584	4.009	2.351	8.554	3.433	0.0376
Ae088	6	83	2.595	4.037	2.309	8.9375	3.49	0.036
Ae088	6	84	2.558	4.049	2.369	8.6385	3.405	0.0368
Ae088	5	85	2.583	3.92	2.337	8.663	3.404	0.0357
Ae088	2	87	2.538	3.91	2.378	8.806	3.364	0.0374
Ae088	1	88	2.57	3.973	2.304	8.446	3.44	0.037
Ae088	2	89	2.512	3.747	2.214	8.2685	3.1545	0.0341
Ae088	1	90	2.417	3.705	2.204	8.4035	3.3095	0.031
Ae088	2	91	2.544	3.918	2.357	8.8455	3.436	0.0381
Ae088	2	92	2.487	3.707	2.236	8.397	3.3135	0.033
Ae088	6	94	2.638	3.987	2.371	8.5725	3.431	0.0415
Ae088	5	96	2.637	3.957	2.399	8.564	3.5005	0.0398
AE357	1	1	2.477	3.559	2.4	8.2245	3.2015	0.0398
AE357	1	2	2.496	3.775	2.32	8.358	3.2385	0.0393
AE357	1	3	2.245	3.846	2.446	8.2715	3.27	0.0396
AE357	3	4	2.465	3.778	2.391	8.414	3.2935	0.04
AE357	1	5	2.451	3.621	2.231	8.266	3.2345	0.0366
AE357	2	6	2.493	3.652	2.357	8.2765	3.1575	0.041
AE357	5	7	2.414	3.741	2.303	8.3445	3.132	0.0385
AE357	2	8	2.514	3.772	2.335	8.4025	3.2095	0.0342
AE357	1	9	2.447	3.645	2.357	8.094	3.2405	0.0394
AE357	2	10	2.482	3.719	2.295	8.16	3.123	0.0401
AE357	2	11	2.504	3.725	2.283	8.463	3.1425	0.0428
AE357	3	13	2.504	3.783	2.356	8.285	3.172	0.0422
AE357	3	14	2.479	3.858	2.314	8.2955	3.2595	0.0432
AE357	5	15	2.516	3.758	2.369	8.2705	3.2685	0.0419
AE357	5	16	2.444	3.79	2.304	7.9265	3.163	0.0459
AE357	2	17	2.452	3.724	2.235	8.1855	3.273	0.0374
AE357	3	18	2.517	4.018	2.316	8.28	3.2685	0.0375
AE357	2	19	2.54	3.751	2.346	8.2665	3.1305	0.0396
AE357	2	20	2.537	3.797	2.476	8.342	3.2325	0.0391
AE357	3	21	2.533	3.735	2.358	8.3205	3.2805	0.0414
AE357	1	22	2.498	3.799	2.394	8.2145	3.296	0.0416
AE357	3	23	2.509	3.812	2.427	8.3985	3.199	0.037
AE357	1	24	2.479	3.69	2.373	8.152	3.216	0.0402
AE357	2	25	2.433	3.764	2.343	8.046	3.053	0.0399
AE357	2	27	2.526	3.643	2.306	8.3085	3.274	0.0391
AE357	2	29	2.536	3.678	2.304	8.297	3.108	0.0405
AE357	1	31	2.516	3.501	2.283	8.523	3.405	0.0397
AE357	2	34	2.501	3.615	2.409	8.017	3.044	0.04
AE357	5	35	2.472	3.808	2.296	8.0335	2.987	0.0402
AE357	2	36	2.493	3.647	2.246	8.248	3.259	0.038
AE357	3	37	2.451	3.783	2.287	8.0535	3.1125	0.0406
AE357	2	38	2.479	3.67	2.273	8.293	3.075	0.0381
AE357	5	39	2.409	3.713	2.336	8.0805	3.1525	0.0394
AE357	5	40	2.475	3.757	2.188	8.2785	3.23	0.0391
AE357	2	41	2.399	3.524	2.296	8.231	3.1955	0.036
AE357	2	42	2.446	3.712	2.338	8.128	3.096	0.0402
AE357	3	43	2.401	3.674	2.292	8.2685	3.242	0.0385
AE357	2	44	2.457	3.75	2.303	8.3025	3.262	0.0393
AE357	2	45	2.426	3.65	2.182	8.141	3.2775	0.0397
AE357	5	47	2.361	3.62	2.106	8.0945	3.133	0.0389
AE357	2	49	2.498	3.677	2.286	8.499	3.1935	0.0365
AE357	3	51	2.496	3.556	2.267	8.658	3.2745	0.0402
AE357	2	52	2.451	3.742	2.124	8.3885	3.1435	0.0405
AE357	2	53	2.425	3.624	2.173	8.1085	3.128	0.0432
AE357	5	55	2.418	3.629	2.23	8.095	3.181	0.0413
AE357	3	56	2.484	3.92	2.483	8.619	3.3905	0.0408
AE357	5	58	2.506	3.677	2.156	8.158	3.1785	0.042
AE357	2	59	2.452	3.716	2.288	8.386	3.267	0.0377
AE357	2	61	2.444	3.685	2.296	8.077	3.163	0.0364
AE357	3	62	2.544	3.713	2.149	8.294	3.2445	0.0425
AE357	2	63	2.514	3.734	2.296	8.2115	3.2545	0.0428
AE357	2	64	2.255	3.696	2.085	8.279	3.155	0.0397
AE357	5	65	2.525	3.789	2.223	8.166	3.1485	0.0365
AE357	2	66	2.457	3.738	2.325	8.1755	3.265	0.0373
AE357	2	67	2.405	3.526	2.204	7.8225	3.1585	0.0387
AE357	2	68	2.523	3.756	2.332	8.298	3.1805	0.0411
AE357	2	69	2.414	3.625	2.23	8.079	3.1715	0.0383
AE357	2	71	2.406	3.621	2.271	7.975	3.0665	0.0392
AE357	2	73	2.494	3.648	2.259	7.886	3.0855	0.0407
AE357	1	74	2.418	3.603	2.261	8.214	3.2645	0.0422
AE357	2	75	2.531	3.675	2.217	8.3255	3.1435	0.0493
AE357	1	77	2.489	3.76	2.164	8.4765	3.3105	0.0392
AE357	2	78	2.424	3.462	2.297	8.232	3.102	0.0344
AE357	2	79	2.507	3.741	2.187	8.3275	3.157	0.0386
AE357	5	80	2.477	3.739	2.268	8.35	3.223	0.0403
AE357	2	81	2.461	3.676	2.274	8.189	3.1725	0.0429
AE357	2	82	2.455	3.657	2.177	8.2685	3.175	0.0408
AE357	2	84	2.514	3.759	2.249	8.1895	3.1515	0.0414
AE357	2	85	2.396	3.563	2.316	8.3085	3.171	0.0416
AE357	2	86	2.435	3.513	2.198	8.28	3.137	0.0384
AE357	1	87	2.33	3.493	2.151	8.0135	3.2065	0.0404
AE357	2	88	2.443	3.589	2.267	8.215	3.1365	0.039
AE357	5	90	2.423	3.507	2.276	8.257	3.113	0.0385
AE357	5	91	2.517	3.693	2.231	8.3585	3.175	0.0412
AE357	4	92	2.434	3.662	2.242	8.459	3.2665	0.0364
AE357	3	94	2.52	3.897	2.349	8.269	3.389	0.0432
AE48	5	6	2.66	4.048	2.409	9.165	3.5595	0.0412089
AE48	4	7	2.651	3.963	2.431	8.9315	3.406	0.0414424
AE48	2	8	2.452	3.773	2.356	8.672	3.364	0.0354887
AE48	2	9	2.47	3.878	2.235	8.78	3.4085	0.0364226
AE48	1	10	2.573	4.091	2.507	8.853	3.32	0.040275
AE48	2	13	2.486	3.938	2.412	8.9605	3.392	0.0395746
AE48	5	15	2.568	3.935	2.386	8.8525	3.4835	0.0427265
AE48	5	16	2.589	3.956	2.37	9.067	3.5445	0.0416759
AE48	5	17	2.588	3.903	2.452	9.024	3.494	0.038057
AE48	5	18	2.67	4.016	2.412	8.831	3.5265	0.0414424
AE48	5	19	2.577	3.874	2.3	8.8525	3.438	0.0373565
AE48	5	20	2.614	3.957	2.362	8.8415	3.504	0.0421428
AE48	5	22	2.646	3.985	2.415	8.8375	3.4745	0.0455283
AE48	5	23	2.631	4.032	2.42	9.0025	3.483	0.0422596
AE48	5	24	2.585	3.874	2.462	8.6615	3.3915	0.040275
AE48	5	25	2.498	3.957	2.466	8.7985	3.4465	0.0393411
AE48	5	26	2.642	4.019	2.42	9.0185	3.516	0.0421428
AE48	4	27	2.529	3.931	2.367	8.864	3.463	0.0382904
AE48	5	28	2.565	3.826	2.367	8.9875	3.4865	0.0382904
AE48	8	29	2.548	3.87	2.245	8.7315	3.439	0.0367728
AE48	4	31	2.519	3.881	2.304	8.7635	3.421	0.0398081
AE48	2	32	2.495	3.864	2.278	9.0325	3.409	0.0350217
AE48	5	33	2.525	3.918	2.38	8.9055	3.4775	0.040275
AE48	5	34	2.565	3.985	2.55	8.9355	3.5425	0.0430767
AE48	8	36	2.583	3.929	2.364	8.955	3.4135	0.0417926
AE48	4	37	2.447	3.708	2.295	8.87	3.345	0.0323367
AE48	1	38	2.577	3.994	2.384	8.9865	3.4315	0.0410922
AE48	1	39	2.525	3.973	2.379	9.038	3.2725	0.0406252
AE48	8	40	2.573	3.873	2.365	9.045	3.429	0.038057
AE48	8	41	2.486	3.89	2.347	8.838	3.3205	0.0374733
AE48	2	48	2.594	3.88	2.333	8.848	3.49	0.0422596
AE48	2	49	2.473	3.75	2.249	8.7465	3.3465	0.0357222
AE48	8	50	2.582	3.946	2.447	8.944	3.409	0.0382904
AE48	5	51	2.511	3.836	2.369	8.909	3.433	0.0340878
AE48	5	52	2.552	3.918	2.406	8.976	3.5155	0.0388741
AE48	1	53	2.568	3.94	2.372	9.046	3.4165	0.0405085
AE48	5	55	2.501	3.869	2.415	8.8505	3.402	0.0351385
AE48	1	56	2.587	3.951	2.349	9.0635	3.4385	0.0386407
AE48	1	58	2.564	4.164	2.472	8.9425	3.482	0.0388741
AE48	8	62	2.524	3.881	2.309	9.0815	3.3635	0.0396913
AE48	5	63	2.517	3.766	2.286	8.8535	3.4205	0.03222
AE48	4	65	2.567	4.002	2.412	9.093	3.3665	0.03759
AE48	5	66	2.662	4.038	2.485	8.9195	3.474	0.0406252
AE48	1	67	2.539	3.891	2.433	8.4735	3.5625	0.0373565
AE48	8	70	2.526	3.92	2.304	8.9785	3.3725	0.0396913
AE48	5	72	2.642	4.052	2.427	8.9465	3.4955	0.0388741
AE48	1	73	2.514	3.898	2.31	8.8335	3.267	0.0367728
AE48	5	74	2.668	4.023	2.422	8.971	3.4395	0.0419094
AE48	1	75	2.57	3.954	2.441	9.134	3.464	0.040275
AE48	1	76	2.559	3.959	2.413	9.186	3.4215	0.0413257
AE48	5	77	2.588	4.026	2.356	8.8585	3.4545	0.0409754
AE48	5	78	2.611	4.049	2.4	8.9295	3.491	0.0448278
AE48	4	79	2.536	3.98	2.383	9.0045	3.387	0.0406252
AE48	5	80	2.508	3.965	2.368	8.912	3.389	0.0372398
AE48	5	82	2.605	4.013	2.343	8.851	3.4905	0.0413257
AE48	4	84	2.548	4.016	2.356	9.06	3.4395	0.0400415
AE48	1	86	2.547	3.926	2.33	8.934	3.28	0.0419094
AE48	1	87	2.495	3.868	2.316	8.9235	3.3275	0.035372
AE48	8	88	2.381	3.719	2.251	8.806	3.3155	0.034438
AE48	8	91	2.543	3.905	2.302	8.7365	3.503	0.0368896
AE48	5	95	2.522	3.749	2.42	8.846	3.398	0.0406252
AE48	5	96	2.593	3.904	2.533	8.8675	3.5405	0.0396913

## Sheet: Queen-Worker skew
Colony	Patriline	relative Wolbachia density	queen-worker skew
Ae48	1	3.7	0.27
Ae48	2	2.3	0.45
Ae48	4	2.7	0.5
Ae48	5	2.8	0.57
Ae48	8	3.6	0.85
Ae153	1	2.2	0.5
Ae153	2	3.4	0.49
Ae153	3	3.3	0.31
Ae07P4	1	1.08	0.5
Ae07P4	2	0.86	0.6
Ae07P4	3	1.3	0.48
Ae07P4	4	0.77	0.54
Ae07P4	6	1.05	0.47
Ae088	1	1.1	0.39
Ae088	2	1.98	0.62
Ae088	5	2.3	0.64
Ae088	6	2.1	0.47
Ae357	1	1.35	0.41
Ae357	2	0.77	0.64
Ae357	3	0.71	0.58
Ae357	5	0.9	0.46
